# Supplementary material
Source: PubMed Central journal article supplement (PMC11559654)
Supplement: NIHMS2032273-supplement-Table_S2.pdf [file NIHMS2032273-supplement-Table_S2.pdf]

**Supplemental Table S2. Metal concentrations from the studies using mixtures analysis methods**

| Source                 | Exposure matrix                 | Metal concentrations                                                                                                                                                                                                           |                                                                                                                                                                                                                                                                                                                                                                                                                                                                                                                                                                                                                                                            |                                                                                                                                                            |
|------------------------|---------------------------------|--------------------------------------------------------------------------------------------------------------------------------------------------------------------------------------------------------------------------------|------------------------------------------------------------------------------------------------------------------------------------------------------------------------------------------------------------------------------------------------------------------------------------------------------------------------------------------------------------------------------------------------------------------------------------------------------------------------------------------------------------------------------------------------------------------------------------------------------------------------------------------------------------|------------------------------------------------------------------------------------------------------------------------------------------------------------|
|                        |                                 | Median (IQR)                                                                                                                                                                                                                   | Mean (SD)                                                                                                                                                                                                                                                                                                                                                                                                                                                                                                                                                                                                                                                  | GM (GSD)                                                                                                                                                   |
| Kupsco et al. 2019     | Blood (µg/dL)                   |                                                                                                                                                                                                                                | As: 0.085 (0.058)<br>Cd: 0.029 (0.019)<br>Co: 0.022 (0.024)<br>Cr: 0.080 (0.128)<br>Cs: 0.310 (0.135)<br>Cu: 158 (32)<br>Mn: 1.5 (0.50)<br>Pb: 3.7 (2.7)<br>Sb: 0.38 (0.10)<br>Se: 25 (4.5)<br>Zn: 613 (130)                                                                                                                                                                                                                                                                                                                                                                                                                                               |                                                                                                                                                            |
| Warembourg et al. 2019 | Blood (µg/L)                    | As: 1.2 (0.3, 2.3)<br>Cd: 0.2 (0.1, 0.3)<br>Co: 0.2 (0.1, 0.3)<br>Cs: 1.6 (1.2, 2.1)<br>Cu: 1420 (1270, 1610)<br>Hg: 1.9 (1.0, 3.4)<br>Mn: 11.1 (8.5, 14.3)<br>Mo: 0.6 (0.5, 0.8)<br>Pb: 9.7 (7.1, 13.2)<br>Tl: 2.0 (2.0, 2.0) |                                                                                                                                                                                                                                                                                                                                                                                                                                                                                                                                                                                                                                                            |                                                                                                                                                            |
| Zanobetti et al. 2020  | Air (ng/m <sup>3</sup> )        |                                                                                                                                                                                                                                | 2-day average<br>Al: 56.63 (36.33)<br>Si: 85.60 (66.48)<br>K: 40.27 (20.25)<br>Ca: 33.33 (18.41)<br>Ti: 3.91 (2.16)<br>Fe: 73.40 (33.51)<br>Mg: 58.09 (22.91)<br>As: 0.62 (0.54)<br>Cu: 3.69 (1.74)<br>Zn: 13.78 (14.09)<br>Br: 0.63 (1.35)<br>Pb: 6.55 (4.12)<br>V: 4.71 (3.35)<br>Ni: 4.26 (3.76)<br>Na: 208.34 (111.18)<br><br>7-day average<br>Al: 57.61 (31.36)<br>Si: 87.77 (59.24)<br>K: 40.09 (13.54)<br>Ca: 34.31 (13.94)<br>Ti: 3.93 (1.51)<br>Fe: 74.77 (23.90)<br>Mg: 58.32 (15.05)<br>As: 0.62 (0.30)<br>Cu: 3.70 (1.02)<br>Zn: 13.89 (7.66)<br>Br: 0.60 (0.75)<br>Pb: 6.60 (2.67)<br>V: 4.79 (2.28)<br>Ni: 4.42 (2.98)<br>Na: 209.36 (76.19) |                                                                                                                                                            |
| Howe et al. 2021       | Urine (µg/L for Co, Se, Mo, As, | Mg: 71.3 (50.5, 100.9) <sup>a</sup><br>Co: 0.46 (0.28, 1.01) <sup>a</sup><br>Se: 21.8 (17.3, 27.0) <sup>a</sup><br>Mo: 64.9 (50.5, 86.7) <sup>a</sup>                                                                          |                                                                                                                                                                                                                                                                                                                                                                                                                                                                                                                                                                                                                                                            | Mg: 66.9 (61.3, 72.9) <sup>a</sup><br>Co: 0.54 (0.48, 0.61) <sup>a</sup><br>Se: 21.72 (20.72, 22.77) <sup>a</sup><br>Mo: 65.26 (61.13, 69.66) <sup>a</sup> |

|                   |                              |                                                                                                                                                     |                                                                                                                                                         |
|-------------------|------------------------------|-----------------------------------------------------------------------------------------------------------------------------------------------------|---------------------------------------------------------------------------------------------------------------------------------------------------------|
|                   | Cd, Sb, and Pb; mg/L for Mg) | As: 12.2 (5.2, 34.5) <sup>a</sup><br>Cd: 0.47 (0.30, 0.69) <sup>a</sup><br>Sb: 0.05 (0.04, 0.07) <sup>a</sup><br>Pb: 1.00 (0.69, 1.48) <sup>a</sup> | As: 15.21 (12.50, 18.49) <sup>a</sup><br>Cd: 0.45 (0.41, 0.50) <sup>a</sup><br>Sb: 0.05 (0.05, 0.06) <sup>a</sup><br>Pb: 0.92 (0.82, 1.04) <sup>a</sup> |
| Zhang et al. 2021 | Blood (µg/dL)                | Pb: 2.42 (1.65, 3.68)<br>Hg: 2.15 (1.06, 3.70)<br>Cd: 0.69 (0.46, 1.04)<br>Se: 278.00 (248.00, 316.00)<br>Mn: 37.30 (28.80, 48.00)                  | Pb: 3.29 (3.03)<br>Hg: 3.15 (3.60)<br>Cd: 0.86 (0.68)<br>Se: 289.50 (60.49)<br>Mn: 39.57 (15.28)                                                        |

Al, Aluminum; As, Arsenic; Br, Bromine; Ca, Calcium; Cd, Cadmium; Co, Cobalt; Cr, Chromium; Cs, Cesium; Cu, Copper; Fe, Iron; GM, geometric mean; GSD, geometric standard deviation; Hg, Mercury; IQR, interquartile range; K, Potassium; Mg, Magnesium; Mn, Manganese; Mo, Molybdenum; Na, Sodium; Ni, Nickel; Pb, Lead; Sb, Antimony; SD, standard deviation; Se, Selenium; Si, Silicon; Ti, Titanium; Tl, Thallium; V, Vanadium; Zn, Zinc

<sup>a</sup> Specific gravity-adjusted median or geometric mean
